# Supplementary material
Source: HighWire-hosted journal article supplement (https://genome.cshlp.org/content/suppl/2005/10/27/15.11.1547)

Figure S2

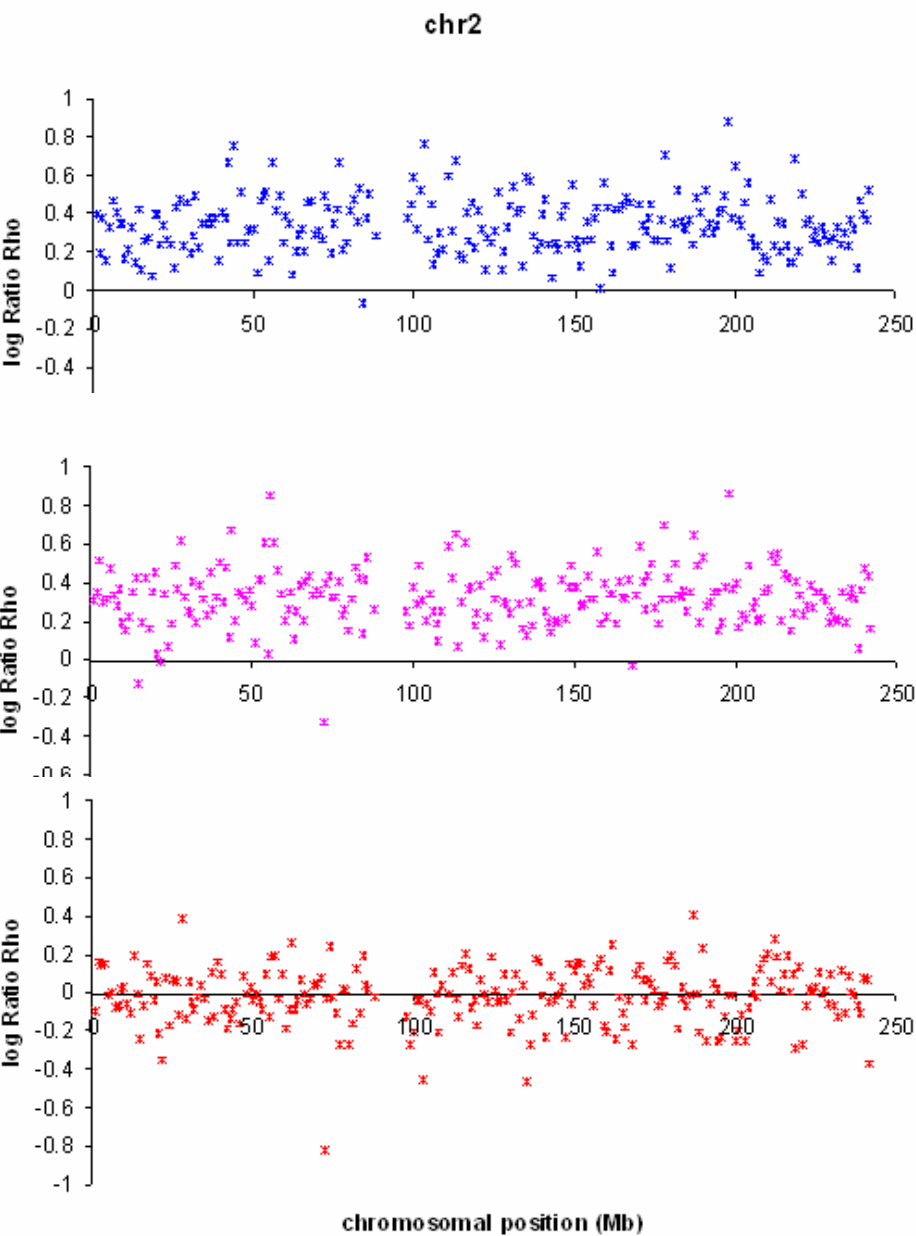

Figure S3

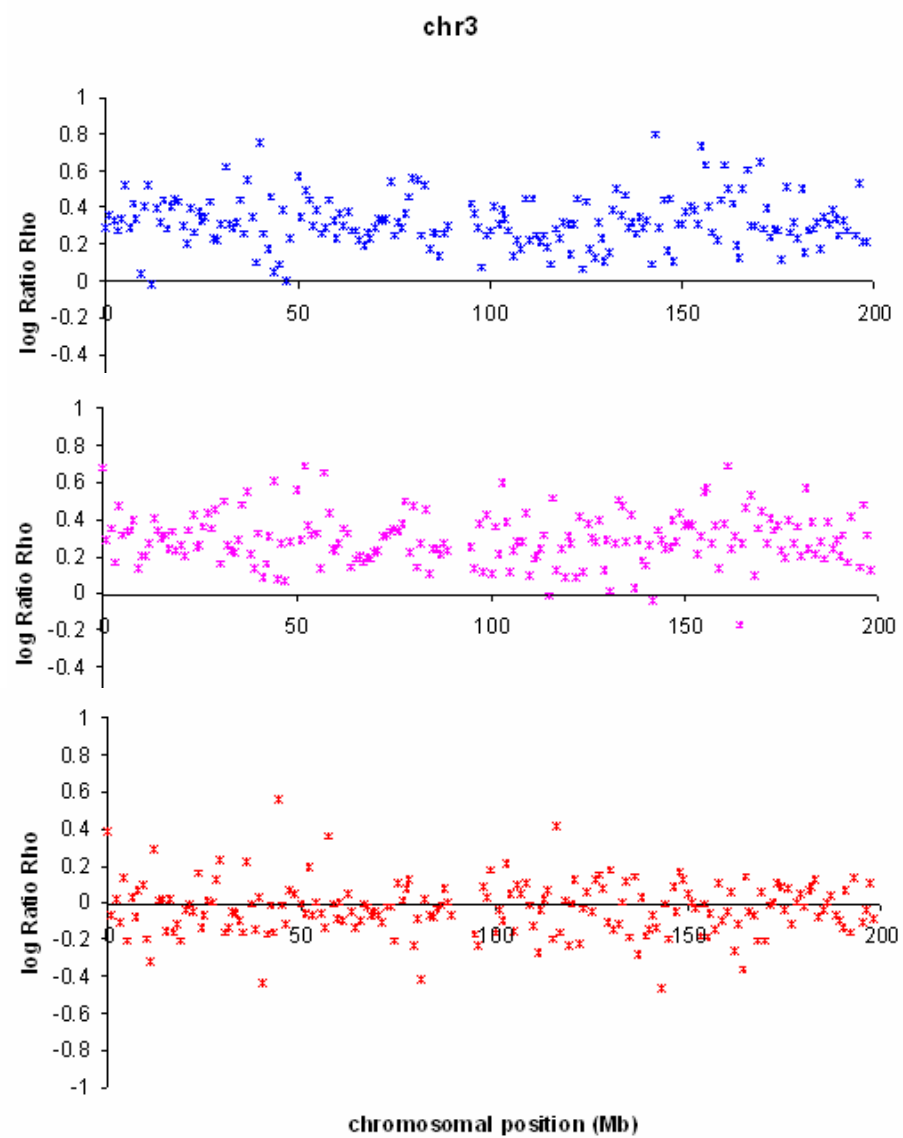

Figure S4

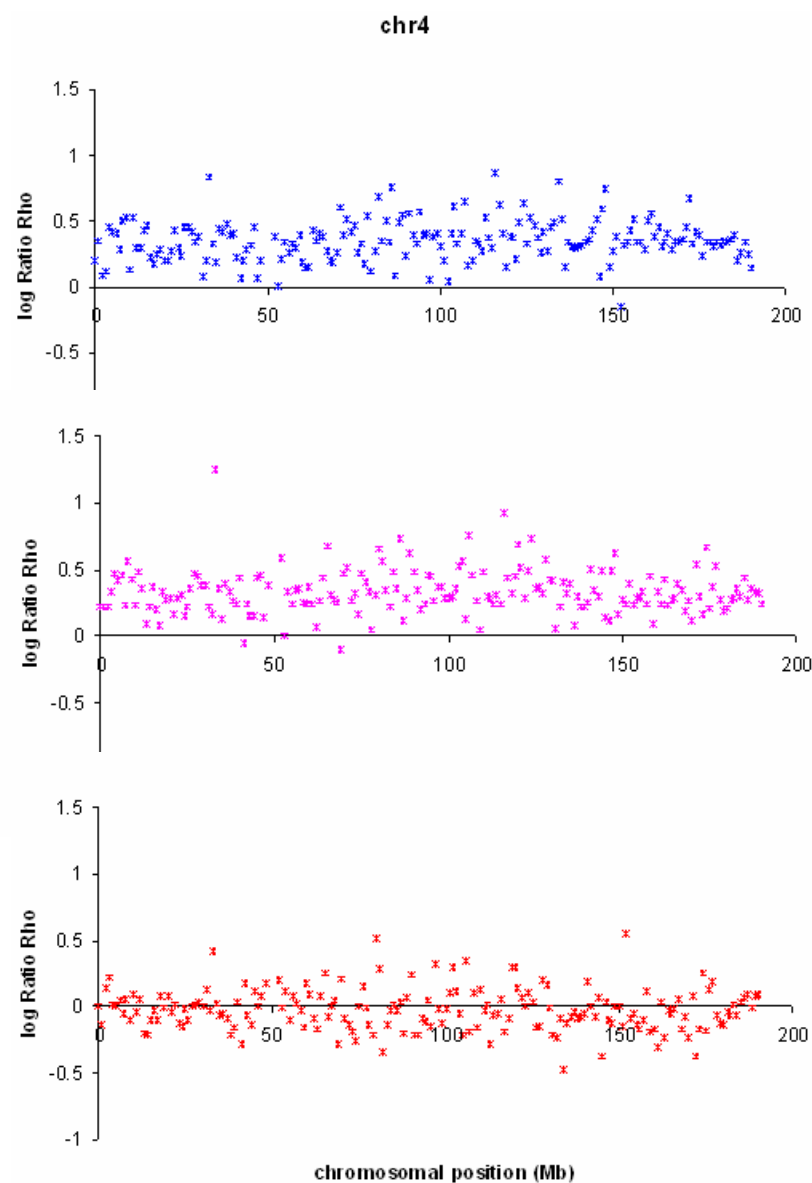

Figure S5

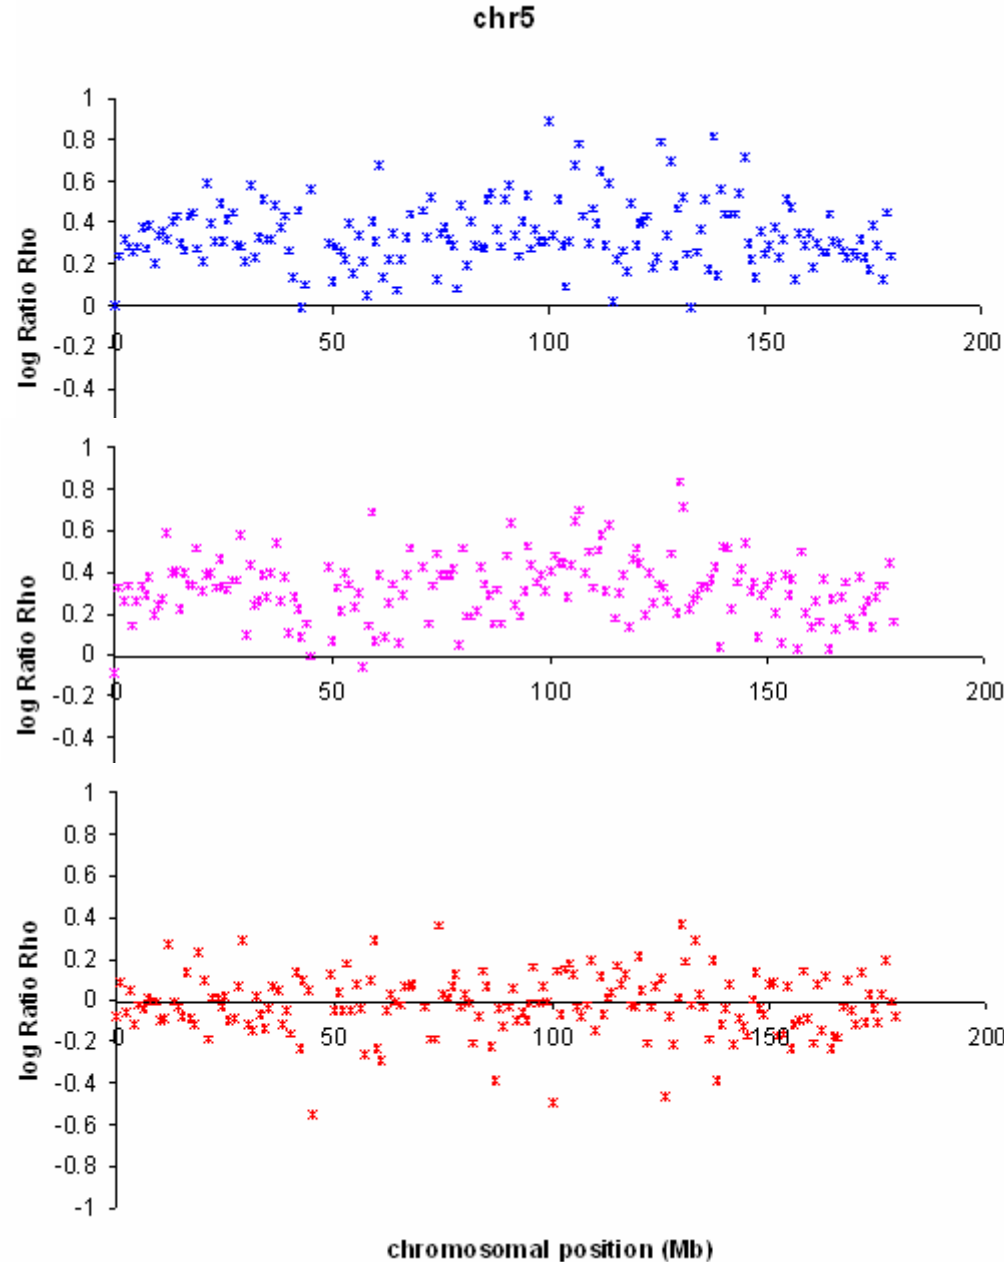

Figure S6

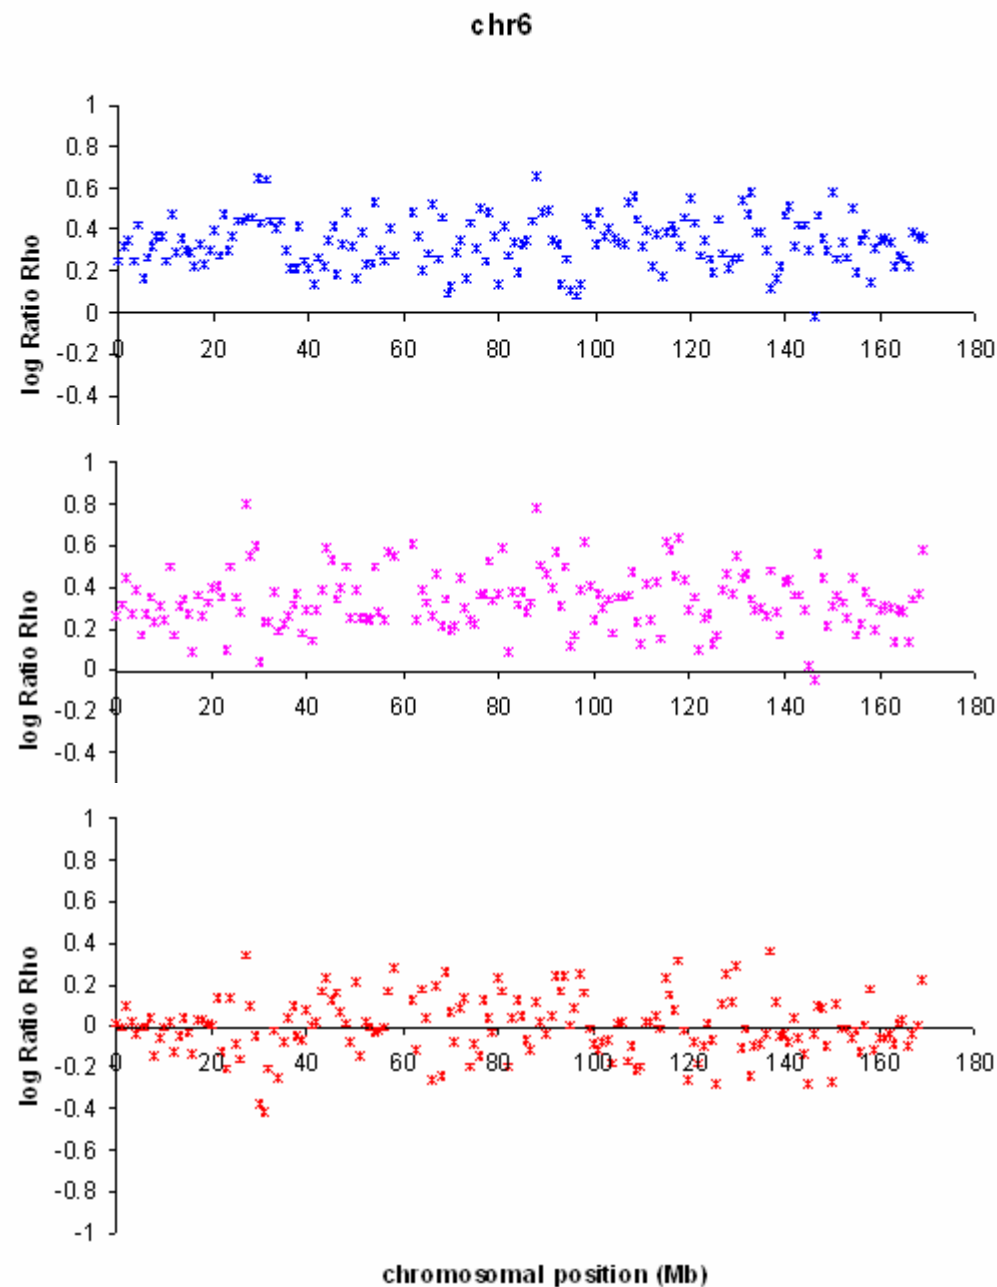

Figure S7

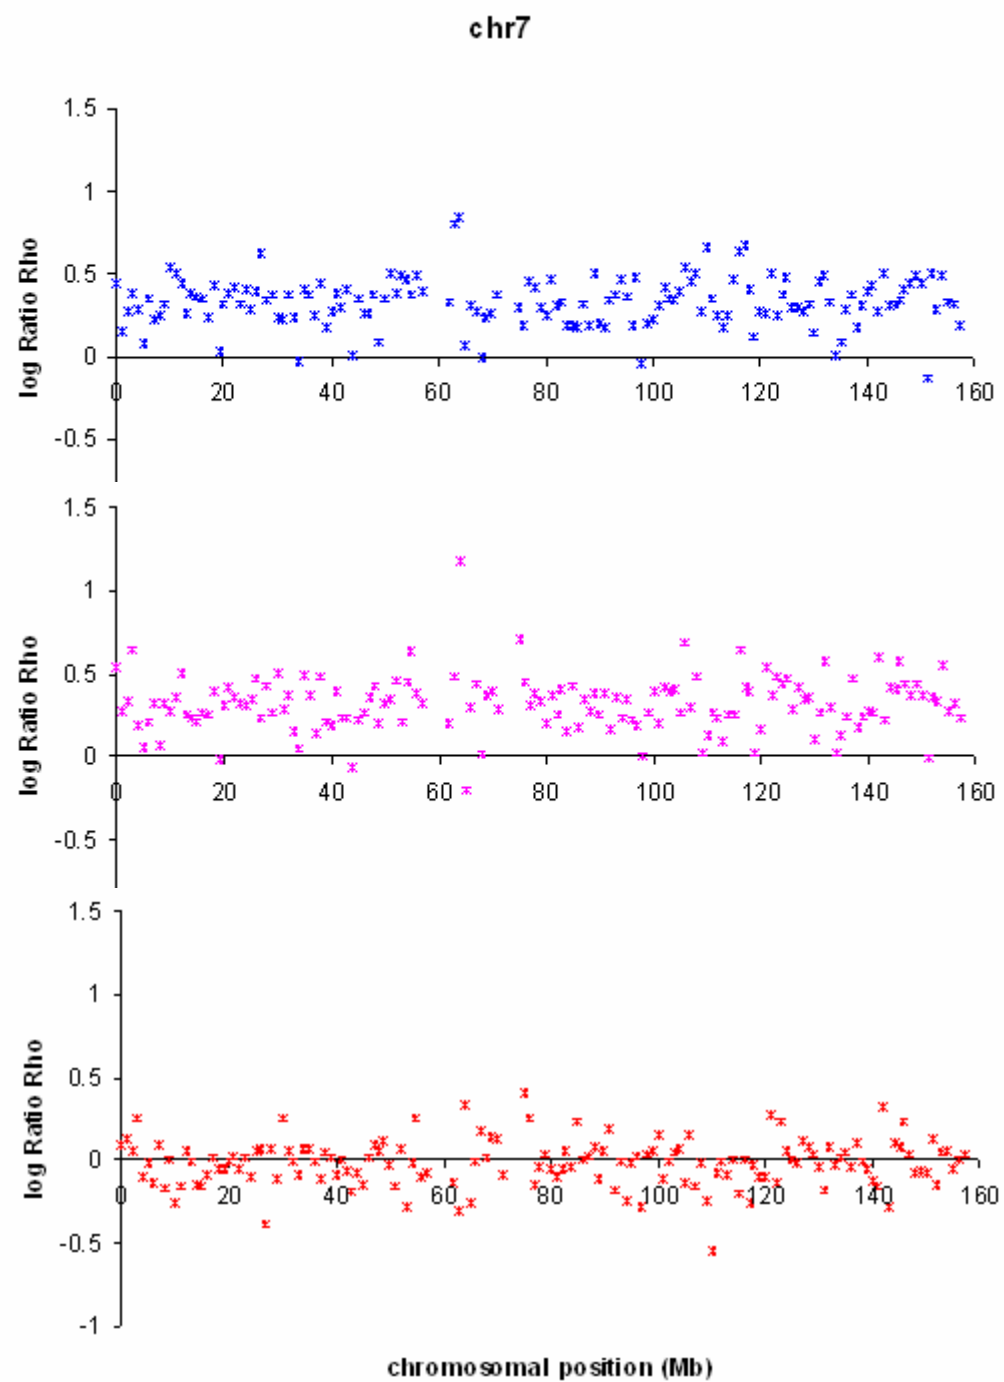

Figure S8

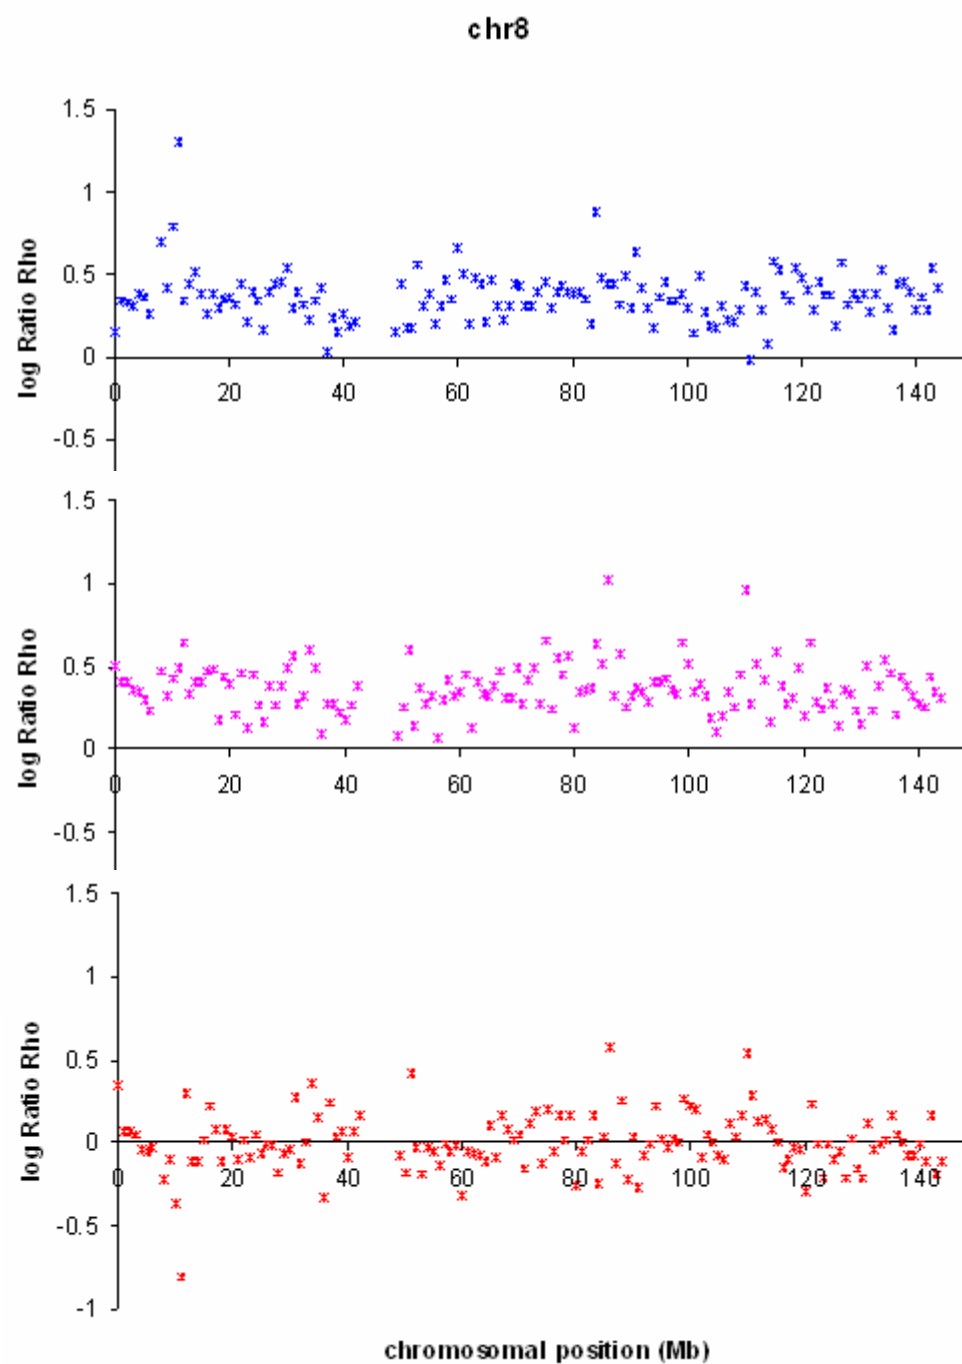

Figure S9

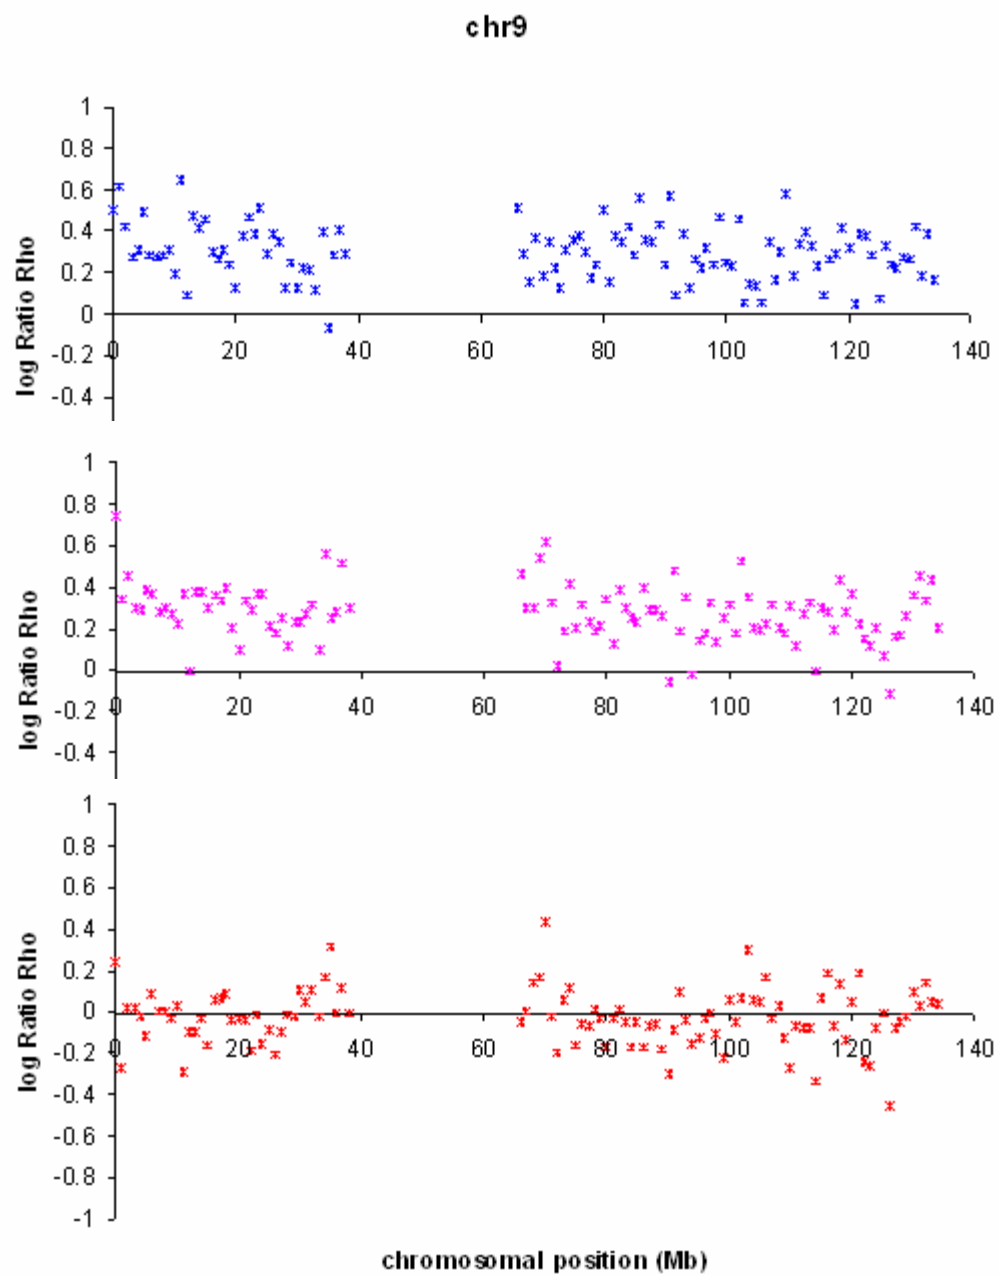



Figure S10

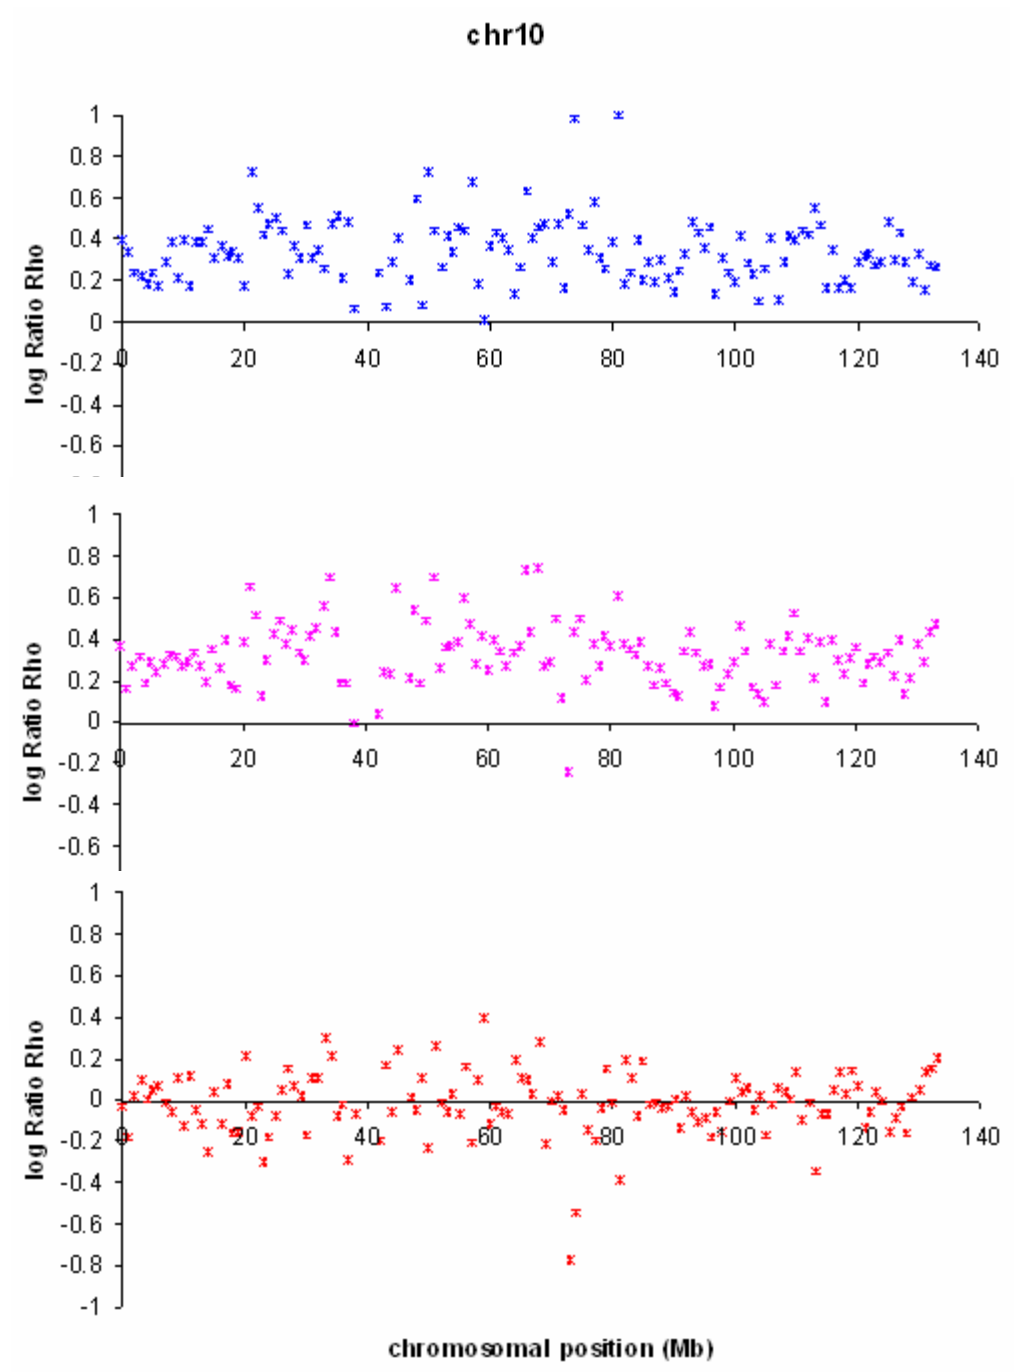

Figure S11

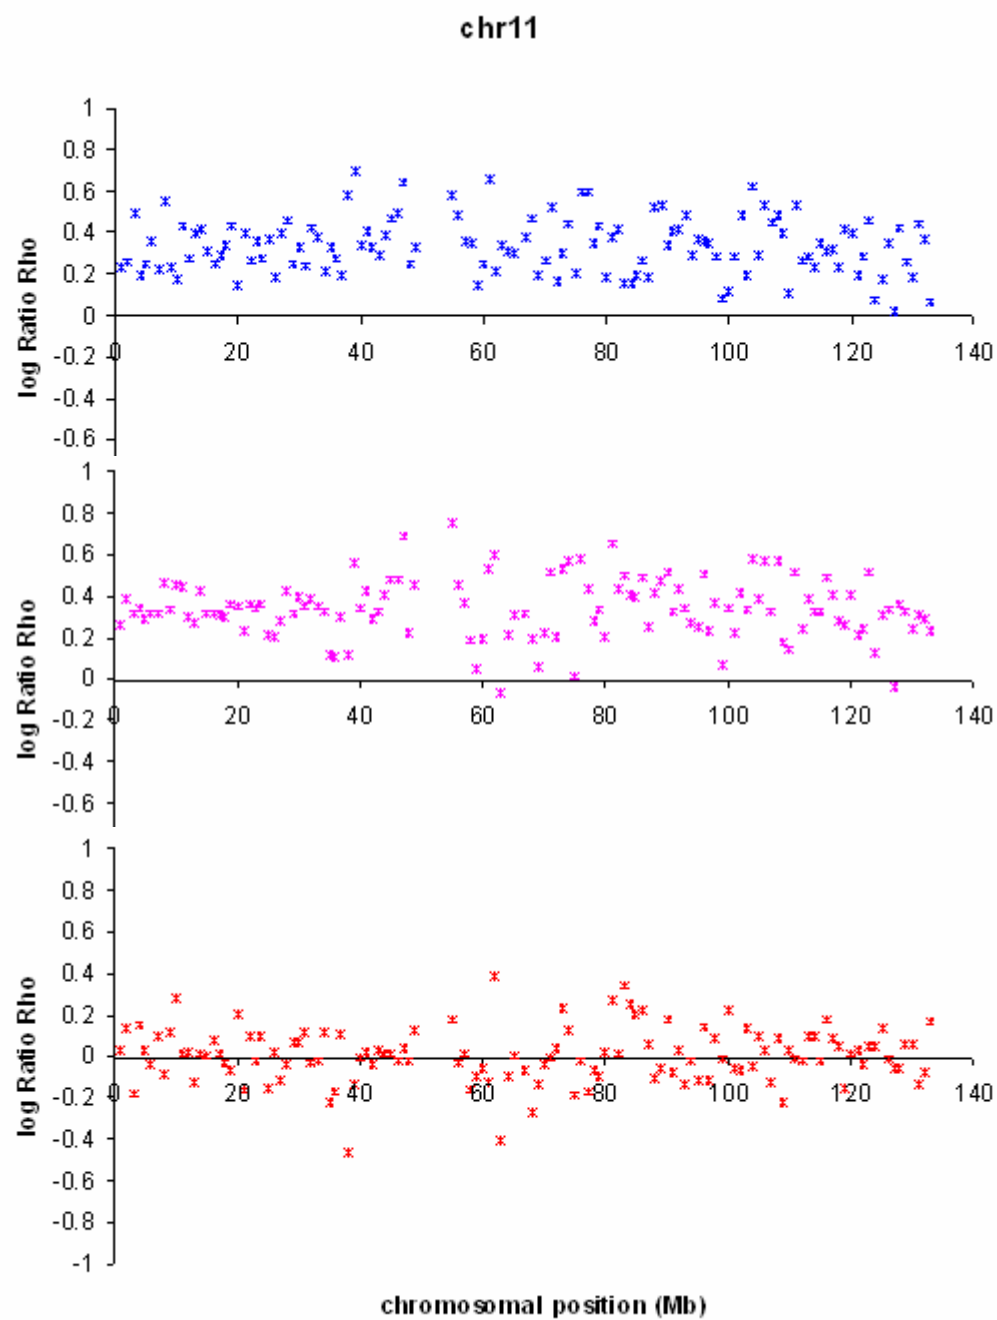

Figure S12

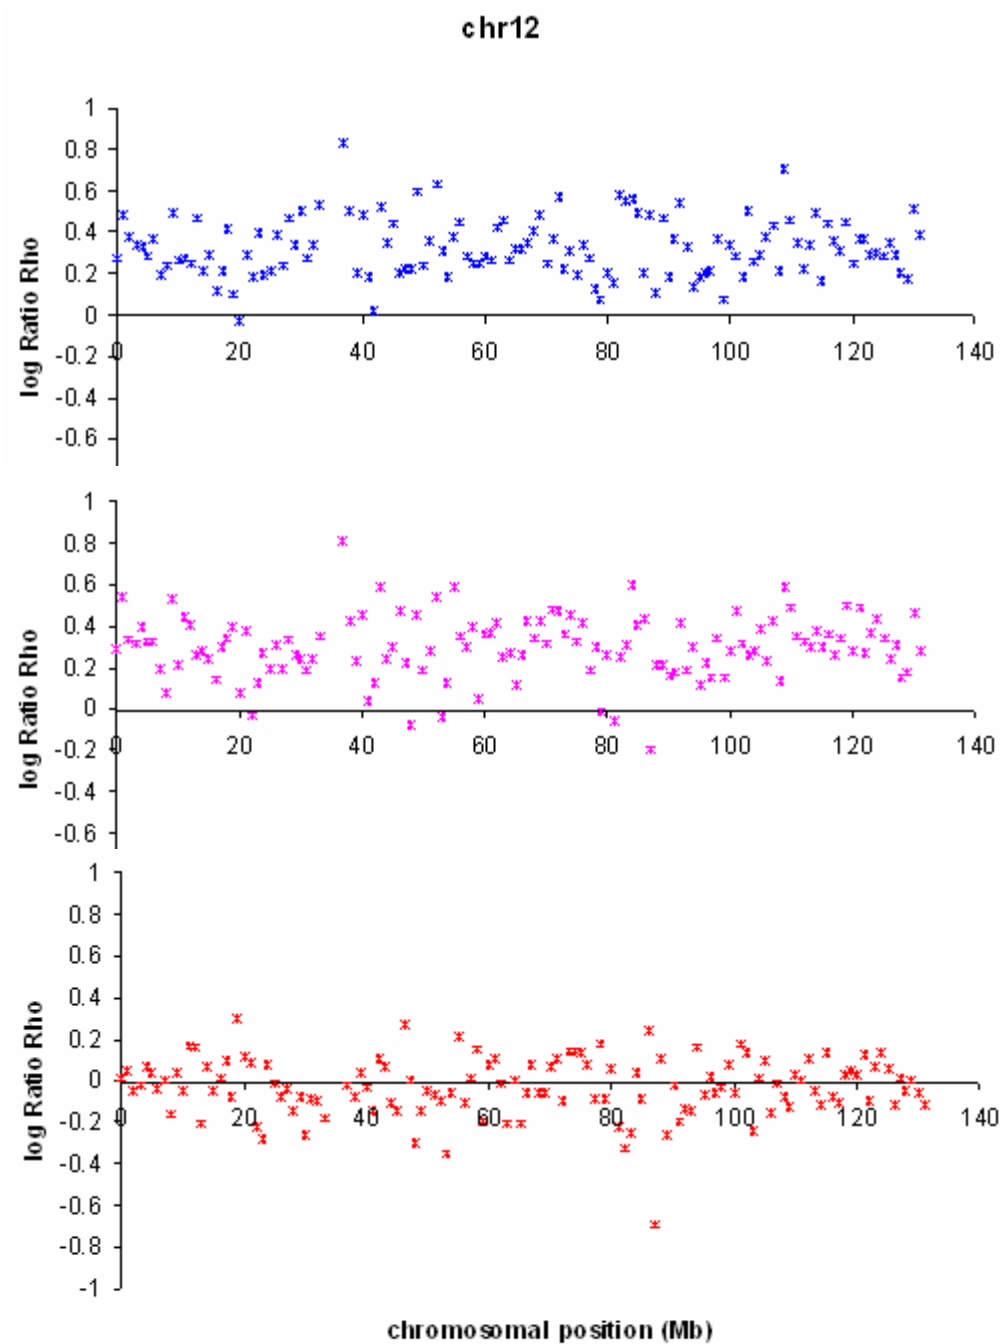

Figure S13

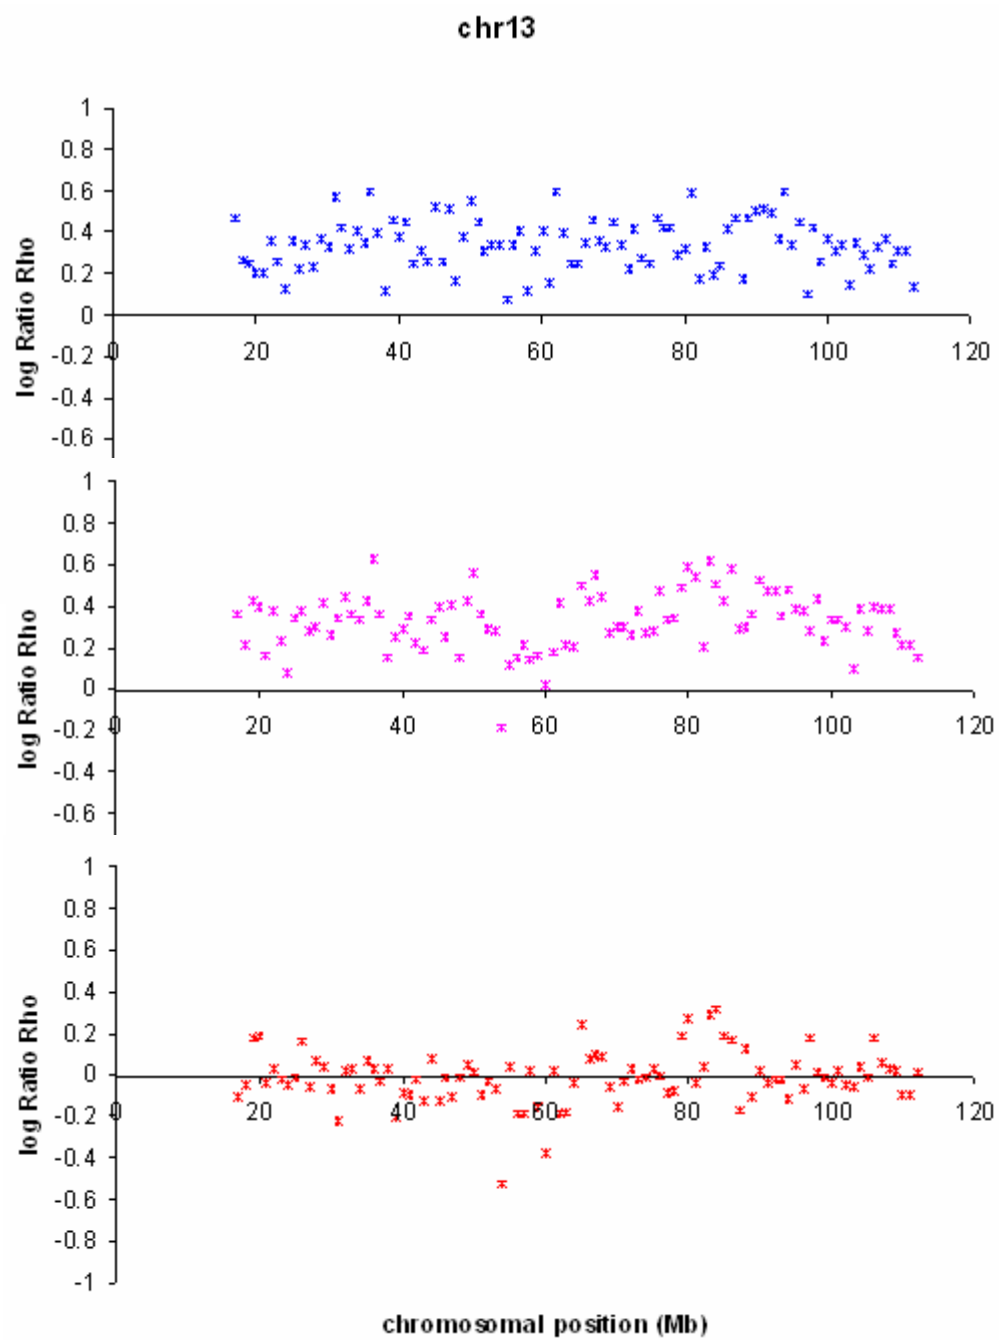

Figure S14

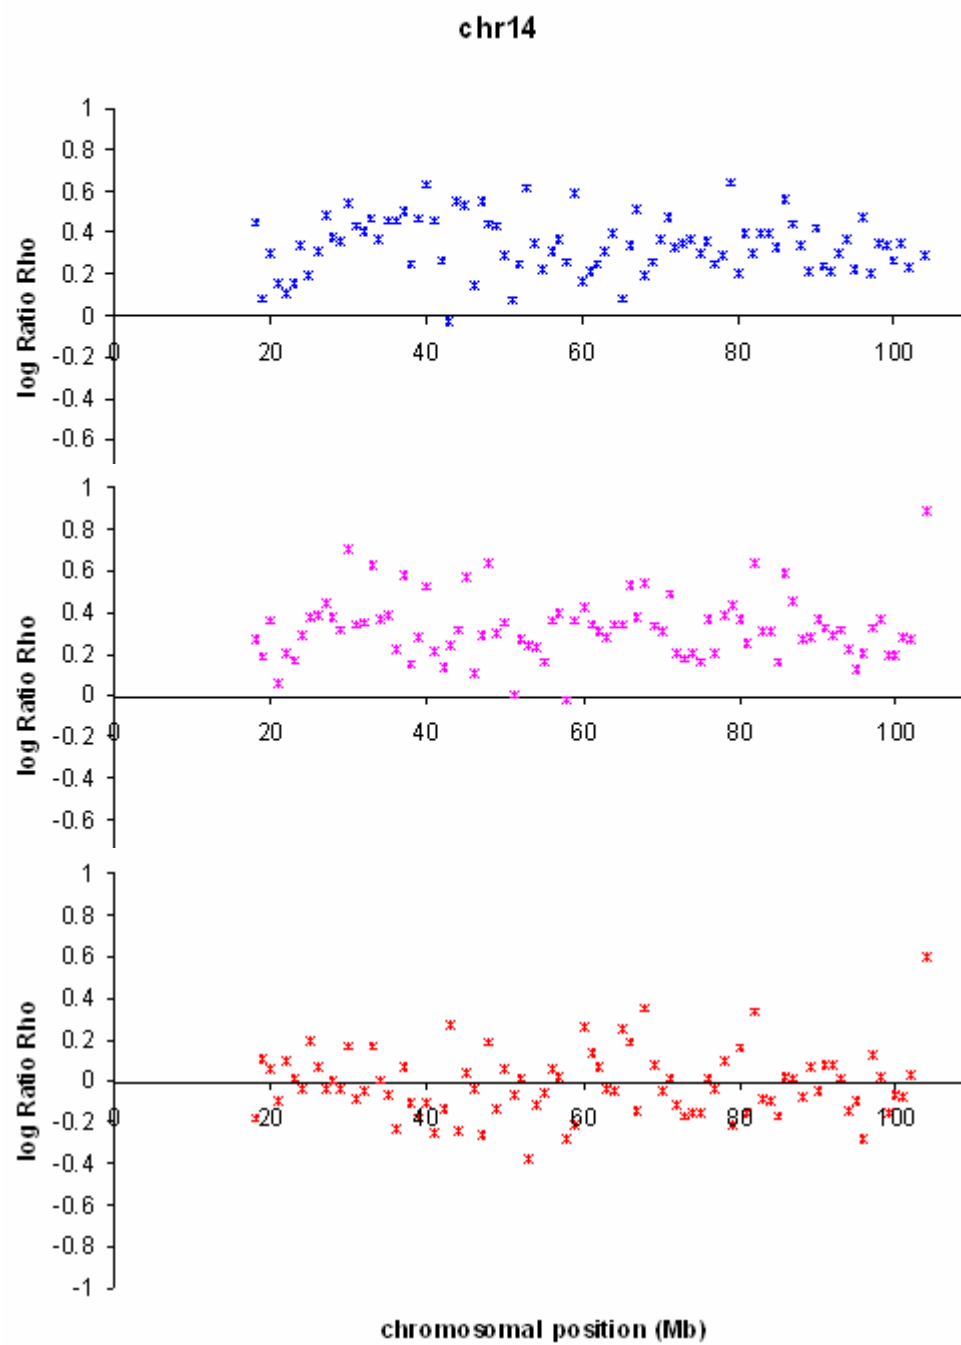

Figure S15

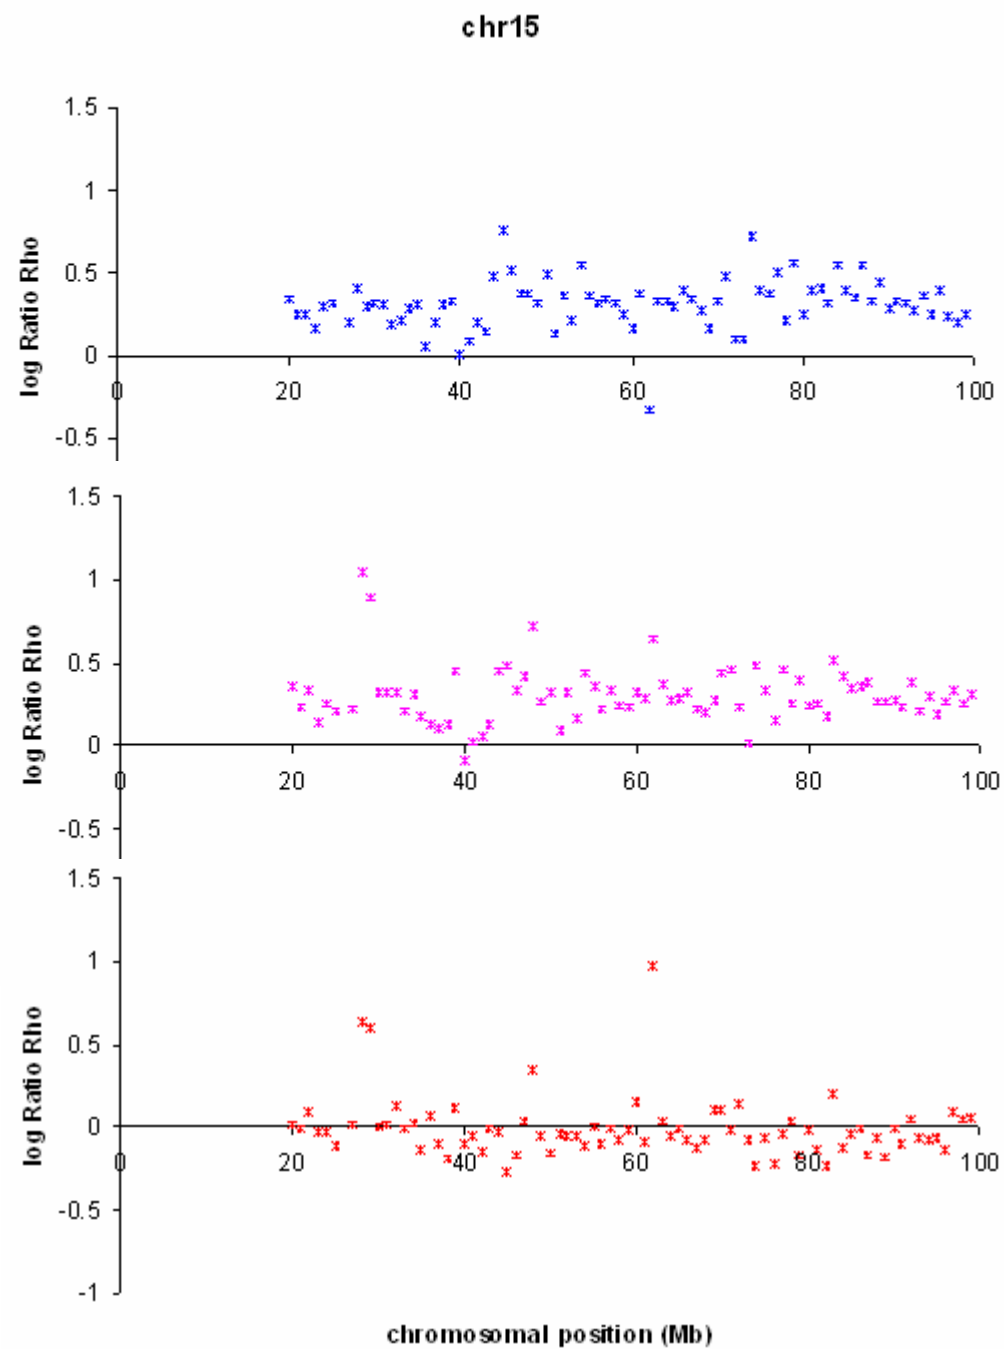

Figure S16

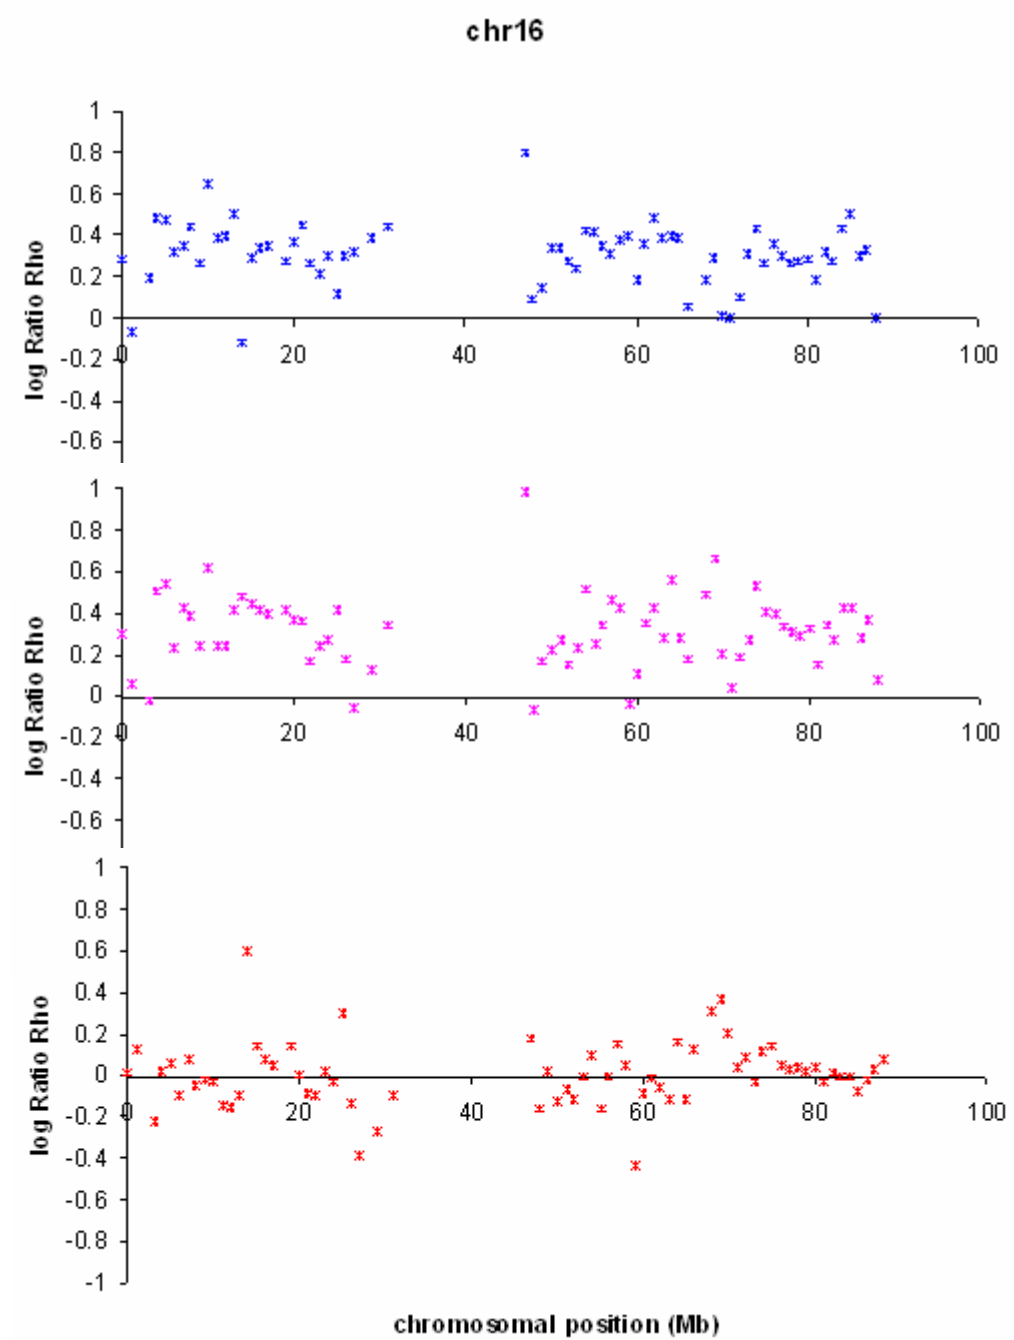

Figure S17

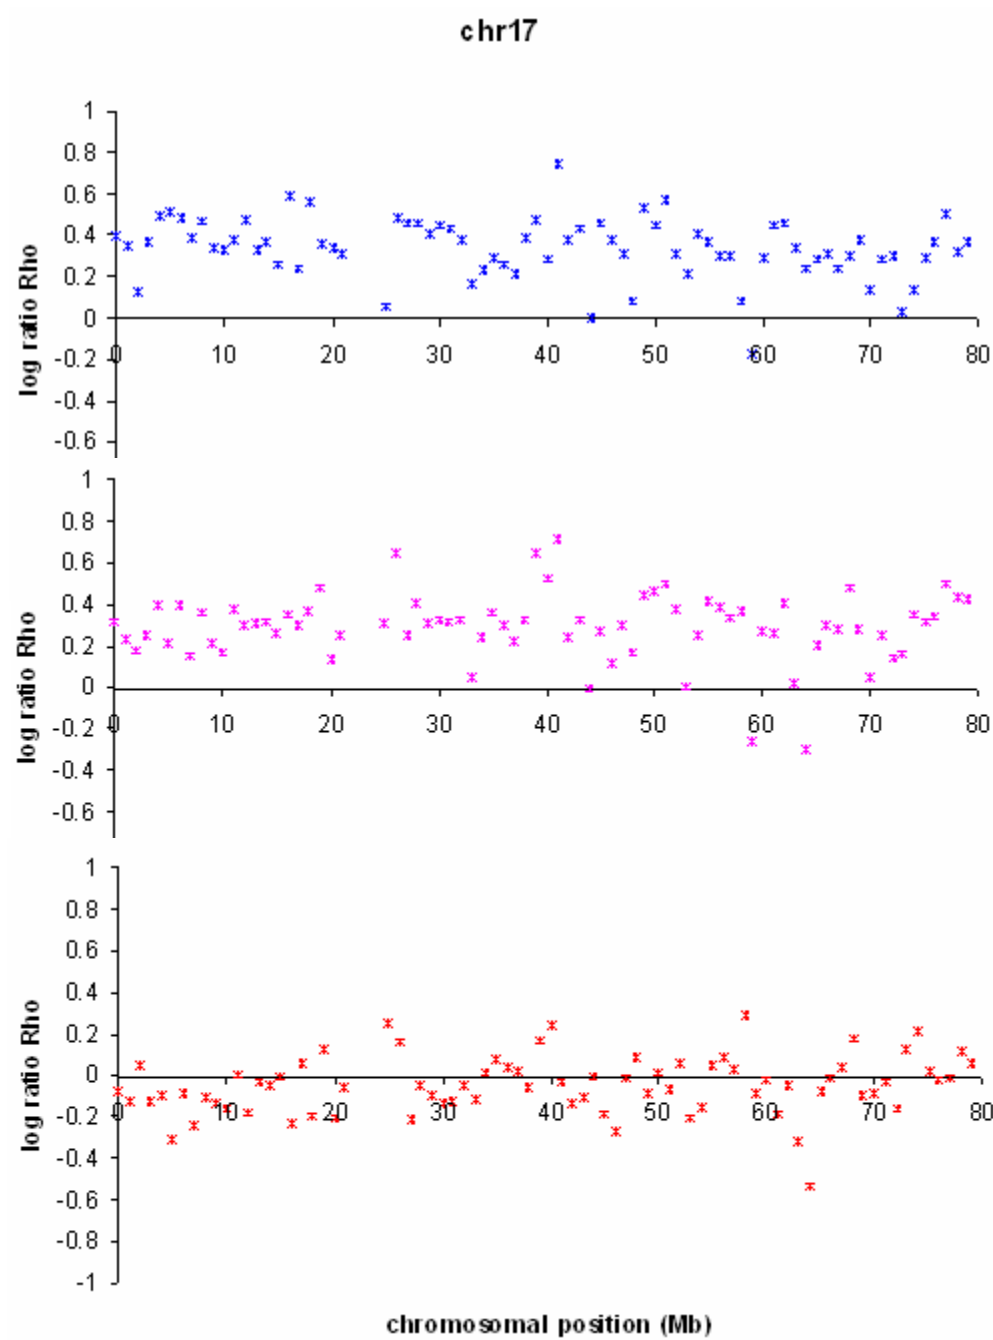



Figure S18

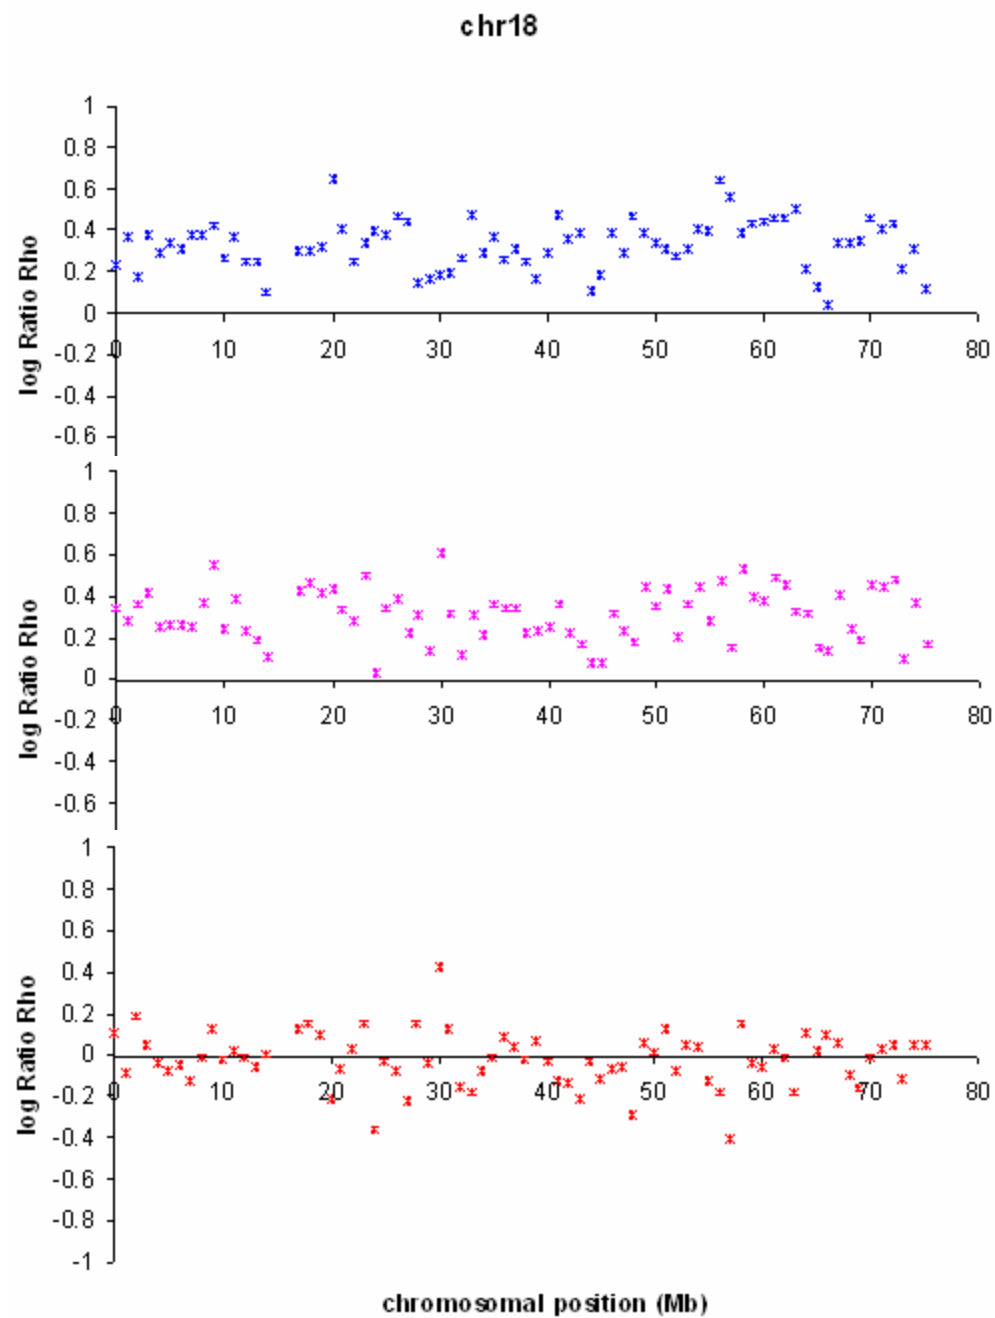

Figure S19

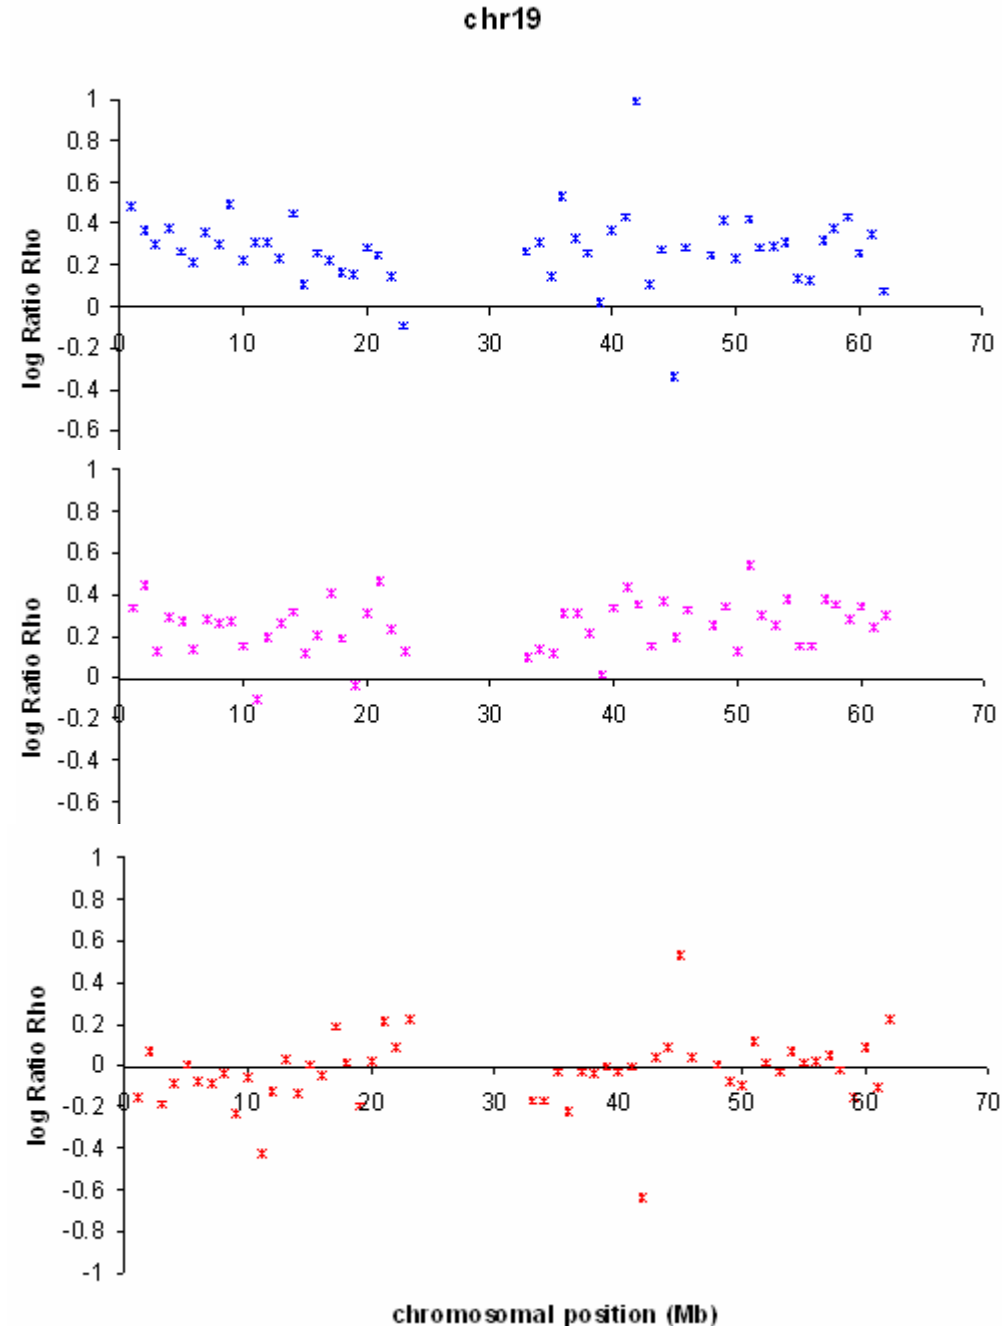

Figure S20

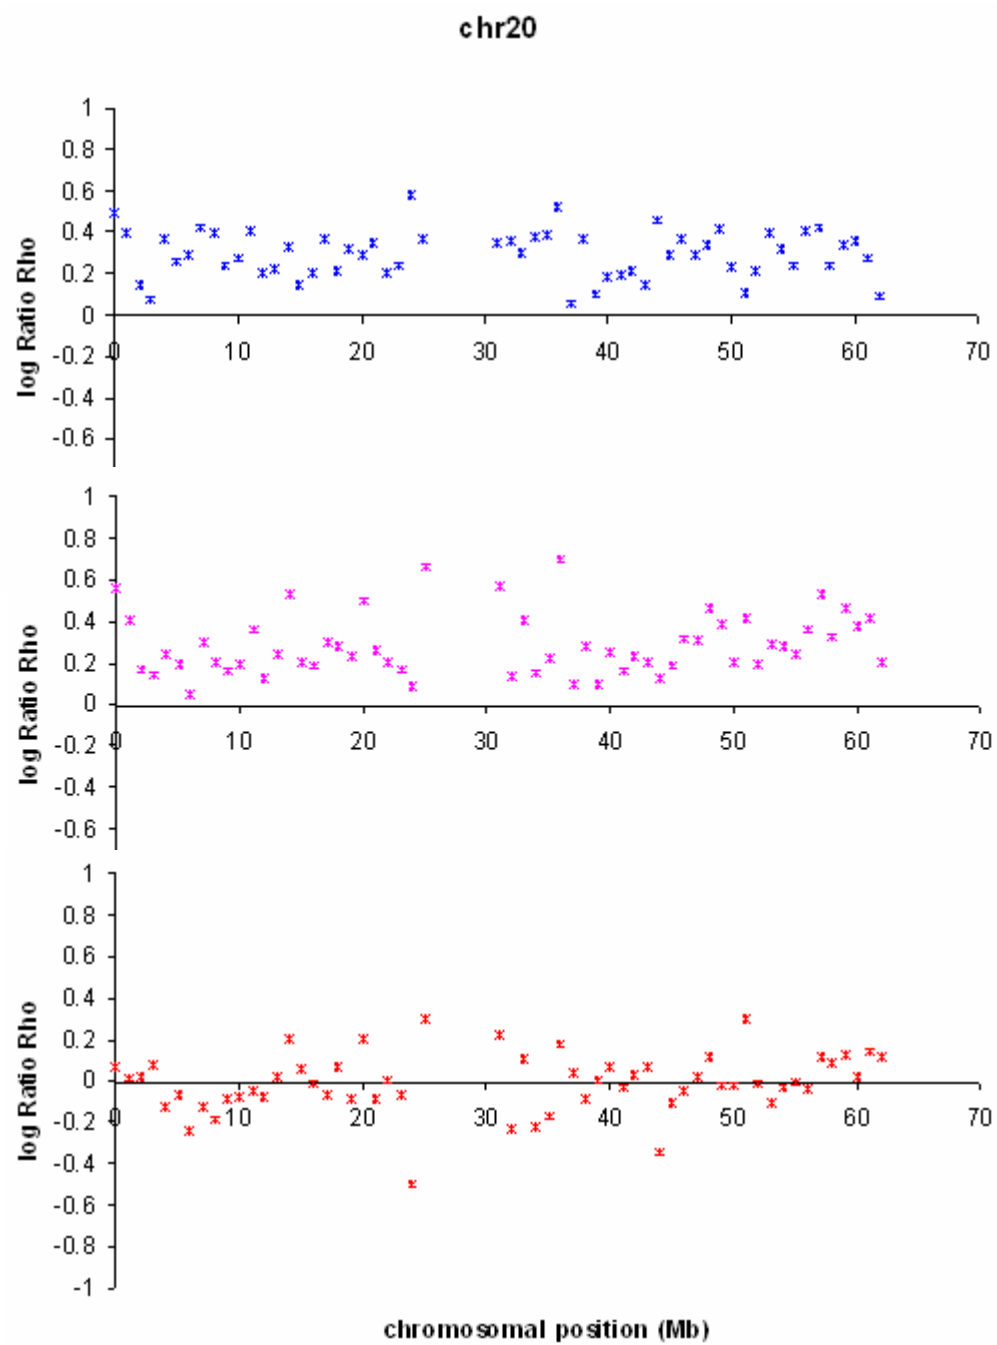

Figure S21

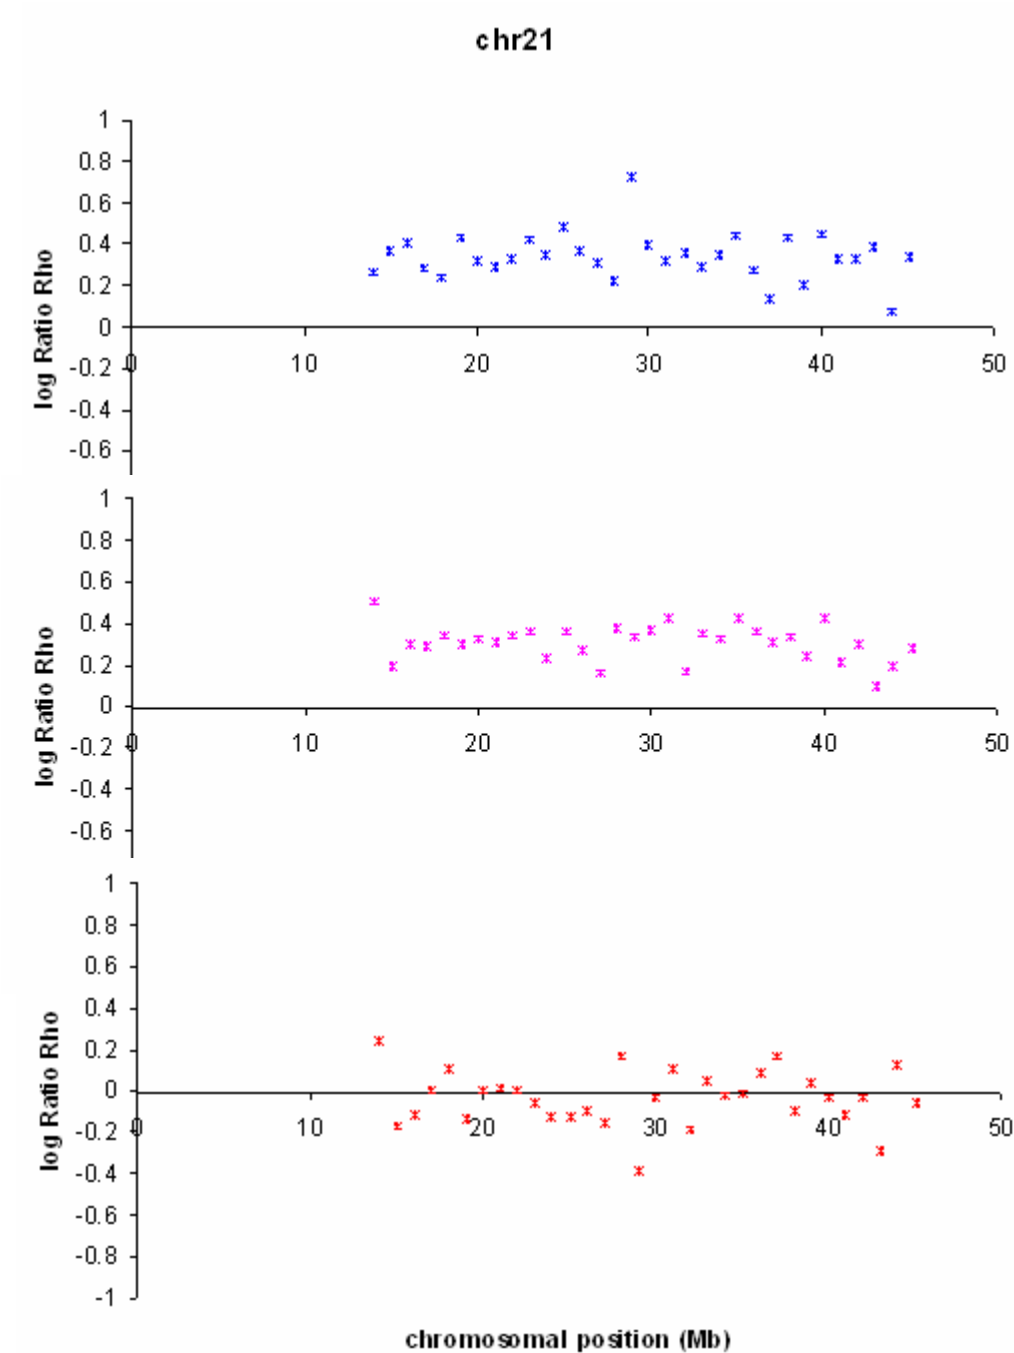

Figure S22

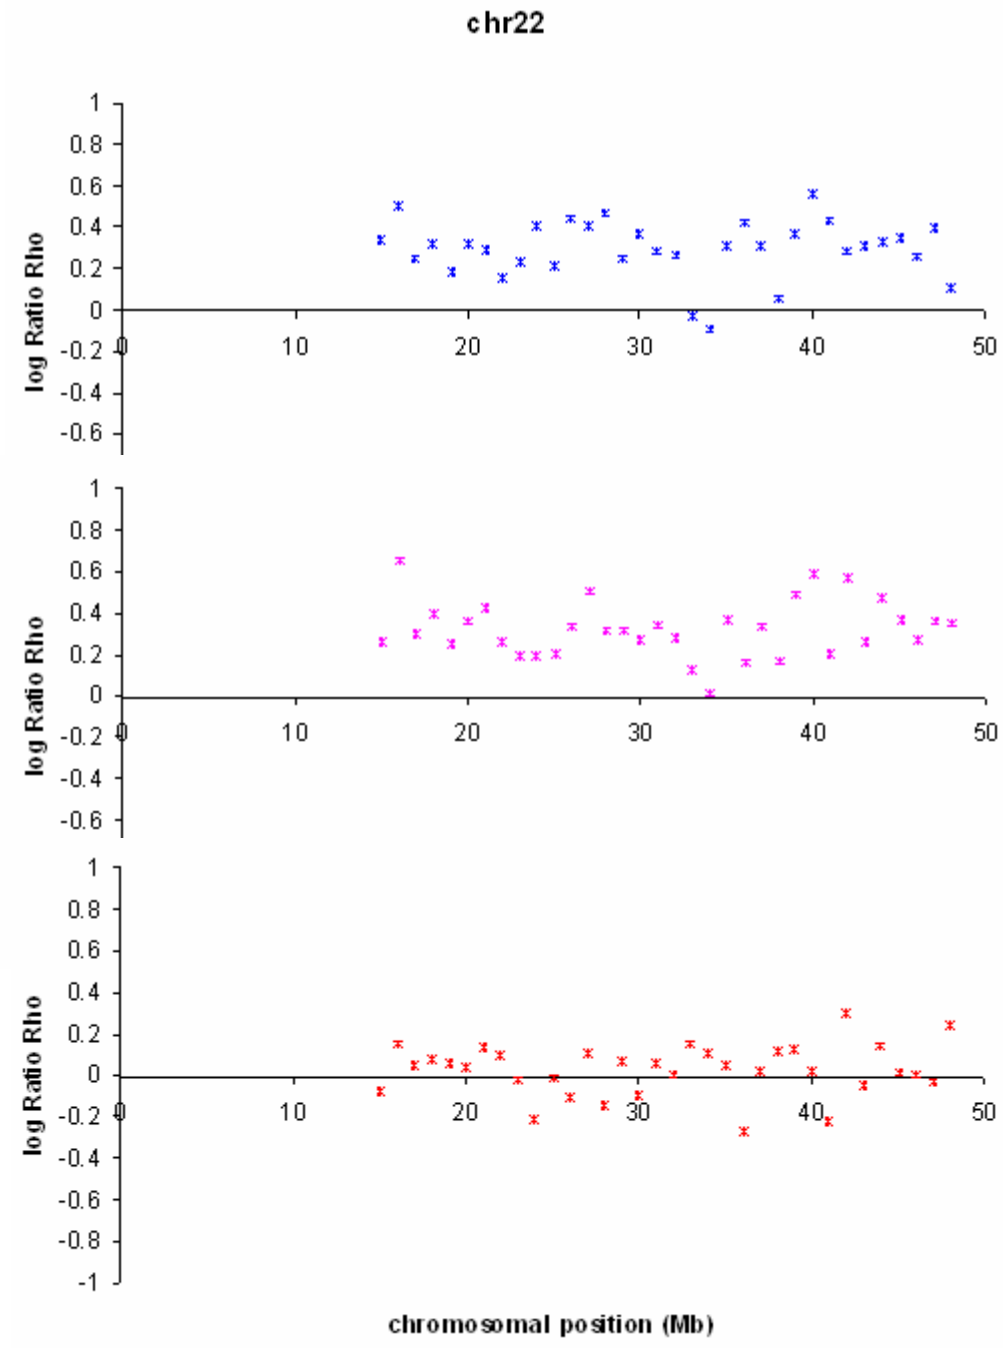

Supplement: SuppFigS2toS22.pdf [file SuppFigS2toS22.pdf]
